# Supplementary material
Source: publisher site journal article supplement (https://www.dovepress.com/get_supplementary_file.php?f=465211.docx)
Supplement: Supplementary file 1 [file get_supplementary_file.php]

**S****UPPLEMENTARY TABLES**

**Supplementary Table S1** Clinical data of 19 MN patients with concomitant malignancy in our center

| **No.** | **Sex,**  **Age**  **(yr)** | **Tumor** | **Diagnosis with cancer before the diagnosis of MN,（mo）** | **Diagnosis with cancer at the same time or following the diagnosis of MN, (mo)** | **NS** | **At the time of Diagnosis** | | | | |
| --- | --- | --- | --- | --- | --- | --- | --- | --- | --- | --- |
| **Prot (g/d)** | 1. **Crea**   **(μmol/l)** | **Alb (g/l)** | **ANA** | **Seurm hepatitis B antigen/antibody** |
| 1 | M, 69 | Esophagus Cancer | NA | NA | Y | 5.1 | 71.0 | 26.5 | 1:100 | - |
| 2 | F, 61 | Colorectal Cancer | 2 mo | N | Y | 2.6 | 69.0 | 23.7 | - | - |
| 3 | M, 57 | Colon Cancer | N | 24 mo after | N | 0.7 | 71.6 | 34.9 | 1:1000 | HbeAb+, HbcAb+ |
| 4 | F, 71 | Thyroid Cancer | 2 mo | N | N | 1.8 | 51.8 | 28.1 | - | - |
| 5 | M, 71 | Bladder Cancer | 5yr | N | N | 3.2 | 64.7 | 39.7 | - | HbeAb+, HbcAb+ |
| 6 | M, 60 | Gastric Cancer | N | 30 mo after | Y | 18.2 | 129 | 18.3 | - | HbcAb+ |
| 7 | M, 48 | Jejunal Stromal Tumor | N | 1 mo after | Y | 14.4 | 114 | 15.9 | - | - |
| 8 | M, 58 | Gastric Cancer | 10 mo | N | N | 1.3 | 51.2 | 30.7 | - | - |
| 9 | M, 46 | Lung Cancer | N | 6 mo after | Y | 6.0 | 70.0 | 29.5 | NA | - |
| 10 | M, 38 | Renal Cell Carcinoma | N | same time | N | 2.6 | 74.8 | 38.1 | - | HbsAg+, HbeAg+  HbcAb+ |

**(Continued) Supplementary Table S1**

| 11 | M, 24 | Atypical Urothelioma | N | 33 mo after | Y | 11.8 | 72.2 | 21.3 | - | - |
| --- | --- | --- | --- | --- | --- | --- | --- | --- | --- | --- |
| 12 | F, 39 | Carcinoma in situ of Cervix | N | 10 mo after | N | 1.9 | 49.2 | 39.9 | 1:100 | - |
| 13 | M, 45 | Nasopharyngeal Carcinoma | 5yr | N | N | 6.7 | 94 | 30.4 | - | - |
| 14 | M, 74 | Prostate Cancer | N | same time | Y | 8.3 | 87.0 | 20.5 | NA | - |
| 15 | F, 58 | Colon Cancer | N | 9 mo after | N | 3.0 | 55.4 | 30.3 | - | - |
| 16 | M, 76 | Urothelial Carcinoma | N | 22 mo after | N | 11.2 | 175.8 | 34.0 | NA | - |
| 17 | F, 56 | Breast Cancer | N | 5 mo after | Y | 5.7 | 51.0 | 28.2 | - | - |
| 18 | M, 49 | Thyroid Cancer | N | 2 mo after | N | 3.55 | 105.2 | 31.3 | - | - |
| 19 | M, 34 | Carcinoma in situ of Cervix | N | 12 mo after | N | 2.9 | 48.0 | 29.5 | NA | HbsAg+, HbeAg+  HbcAb+ |

**Abbreviation**: M, male; F, female; (+), positive levels; mo, month; yr, year; NS, nephrotic syndrome; Y, yes; N, no; Prot, 24 hours urinary protein quantitation; S-Crea, serum creatinine; Alb, Albumin; ANA, antinuclear antibody; NA, not applicable.

**Supplementary Table S2** Treatment and prognosis of 19 MN patients with concomitant malignancy in our center

| **No.** | **Age** | **Sex** | **Tumor Treatment** | **MN Treatment** | **End Point** | **Renal**  **Outcome** | **Follow-Up**  **Time, mo** |
| --- | --- | --- | --- | --- | --- | --- | --- |
| 1 | 69 | M | NA | NA | NA | NA | NA |
| 2 | 61 | F | Surgery,  Chemotherapy | NA | S-Crea: 72μmol/l  Prot: 0.8 g/d | PR | 34 |
| 3 | 57 | M | NA | CsA | NA | NA | NA |
| 4 | 71 | F | Surgery | ARB | S-Crea: 39.9μmol/l  Prot: 0.15g/d | CR | 36 |
| 5 | 71 | M | NA | ARB | NA | NA | NA |
| 6 | 60 | M | NA | NA | NA | NA | NA |
| 7 | 48 | M | Surgery | NA | NA | NA | NA |
| 8 | 58 | M | Surgery,  Chemotherapy | ARB | S-Crea: 55μmol/l  Prot: 1.5g/d | PR | 6 |
| 9 | 46 | M | Surgery,  Palliative Radiation  Therapy | CsA | Patient deceased because of the tumor | Death | 19 |
| 10 | 38 | M | Surgery | ARB | S-Crea: 67.0μmol/l  Prot: 0.6g/d | PR | 15 |
| 11 | 24 | M | Surgery | CsA | S-Crea: 93.1μmol/l  Prot: 7.0g/d | PR | 40 |
| 12 | 39 | F | Surgery | Prednisone, MMF | S-Crea: 54.2μmol/l | CR | 20 |
| 13 | 45 | M | Surgery | Prednisone,  Tacrolimus | S-Crea: 97.3μmol/l | NA | 8 |

**(Continued) Supplementary Table S2**

| 14 | 74 | M | Surgery,  Chemotherapy | ACEI | S-Crea: 131.1μmol/l  Prot: 1.1g/d | PR | 36 |
| --- | --- | --- | --- | --- | --- | --- | --- |
| 15 | 58 | F | NA | CsA | NA | NA | NA |
| 16 | 76 | M | Surgery,  Chemotherapy | CsA | Patient deceased because of the tumor | Death | 7 yr |
| 17 | 56 | F | Chemotherapy | CsA | S-Crea: 85μmol/l  Prot: 2.3g/d | PR | 7 |
| 18 | 49 | M | Surgery | Prednisone,  Tacrolimus | 1. Crea: 124.7   Prot: 12.32g/d | Non-remission | 4 |
| 19 | 34 | F | Surgery | ACEI | NA | NA | NA |

**Abbreviation**: M, male; F, female; CsA, [cyclosporin A](javascript:void(0)); MMF, mycophenolate mofetil; ACEI, angiotensin-converting enzyme inhibitors; Prot, 24 hours urinary protein quantitation; S-Crea, serum creatinine; CR, complete remission; PR, partial remission; mo, month; yr, year; NA, not applicable.

**Supplementary Table S3** Pathologic data of 19 MN patients with concomitant malignancy in our center

| **No.** | **IF** | | | | | | | | | **LM** | | **EM** |
| --- | --- | --- | --- | --- | --- | --- | --- | --- | --- | --- | --- | --- |
| **IgG** | **IgA** | **IgM** | **C3** | **C1q** | **IgG1** | **IgG2** | **IgG3** | **IgG4** | **Tubulointerstitial fibrosis** | **Segmental mesangial lesions** | **Biopsy with electron-dense deposits** |
| 1 | + | - | - | ±-+ | - | - | - | - | + | No | N | Subepithelial |
| 2 | + | - | - | 3+ | - | 2+-3+ | - | - | 2+-3+ | Minor | N | Subepithelial |
| 3 | + | - | - | + | - | - | - | - | 2+ | Minor | N | Subepithelial |
| 4 | + | - | - | + | - | - | - | - | 2+ | Minor | N | NA |
| 5 | + | - | - | + | 2+ | 2+ | - | - | - | Moderate | N | Subepithelial |
| 6 | + | - | - | 2+ | - | +-2+ | + | ± | 2+ | Minor | N | Subepithelial |
| 7 | + | + | - | 3+ | - | - | - | - | 2+ | Minor | N | Subepithelial |
| 8 | + | - | - | + | - | - | - | - | +-2+ | Minor | N | Subepithelial |
| 9 | + | - | - | 3+ | - | - | 2+ | - | - | Minor | N | Subepithelial |
| 10 | + | - | + | 2+-3+ | 2+ | - | 2+ | - | - | Minor | Y | Subepithelial, Mesangial, Subendothelial |
| 11 | + | - | + | 3+ | - | 2+ | - | - | 2+ | Minor | N | Subepithelial |
| 12 | + | - | - | 2+-3+ | 2+ | - | 2+ | - | 3+ | No | N | Subepithelial,  Within the basement membrane,  Mesangial |
| 13 | + | - | - | 3+ | - | 2+ | - | - | 3+ | Extended | N | Subepithelial, within the basement membrane |

**(Continued) Supplementary Table S3**

| 14 | + | - | - | 2+ | - | - | - | - | 2+ | Moderate | Y | Subepithelial |
| --- | --- | --- | --- | --- | --- | --- | --- | --- | --- | --- | --- | --- |
| 15 | + | - | - | + | - | - | - | - | +-2+ | Minor | N | Subepithelial, within the basement membrane |
| 16 | + | + | + | 2+ | - | - | 2+ | 2+ | 2+ | Moderate | N | Subepithelial, within the basement membrane |
| 17 | + | - | - | 2+ | - | - | - | - | 2+ | Minor | N | Subepithelial, within the basement membrane |
| 18 | + | + | + | 2+ | - | - | - | - | 2+ | Extended | N | Subepithelial, within the basement membrane |
| 19 | + | + | - | 2+ | - | 2+ | - | - | - | Minor | Y | Subepithelial, within the basement membrane |

**Abbreviation**: IF, immunofluorescence; LM, light microscope; EM, electron microscope; (+), positive levels; IgG, immunoglobulin G; IgA, immunoglobulin A; IgM, immunoglobulin M; C3, complement component 3; C1q, complement component 1q; Y, yes; N, no; NA, not applicable.

**Supplementary Table S4** Specific antigens and antibodies of 19 MN patients with concomitant malignancy in our center

| **No.** | **Anti-PLA2R antibody** | **PLA2R**  **antigen** | **Anti-THSD7A**  **antibody** | **THSD7A antigen** | **Anti-NELL-1 antibody** | **NELL-1**  **antigen** | **EXT**  **antigen** |
| --- | --- | --- | --- | --- | --- | --- | --- |
| 1 | + | + | - | - | - | - | - |
| 2 | NA | + | NA | - | NA | - | - |
| 3 | - | + | - | - | - | - | - |
| 4 | + | + | - | + | - | - | - |
| 5 | - | - | - | + | - | - | - |
| 6 | - | - | - | + | - | - | - |
| 7 | + | + | - | - | - | - | - |
| 8 | - | + | - | - | - | - | - |
| 9 | NA | - | NA | - | NA | + | - |
| 10 | - | - | - | + | - | - | - |
| 11 | + | + | - | - | - | - | - |
| 12 | - | - | - | - | - | - | EXT1+, EXT2+ |
| 13 | + | + | - | - | - | - | - |
| 14 | + | + | NA | - | NA | - | - |
| 15 | NA | + | NA | - | NA | - | - |
| 16 | NA | + | NA | - | NA | - | - |
| 17 | + | + | - | - | - | - | - |
| 18 | + | + | NA | - | NA | - | - |
| 19 | + | + | NA | - | NA | - | - |

**Abbreviation**: (+), positive levels; PLA2R, phospholipase A2 receptor; THSD7A, thrombospondin type 1 domain-containing 7A; NELL-1, neural epidermal growth factor-like 1 protein; EXT1/2, exostosin1/2; NA, not applicable.

**Supplementary Table S5** Clinical and pathologic data of 21 MN patients with concomitant malignancy from the literature review

| **Study** | **Age** | **Sex** | **Tumor** | **Time of Diagnosis of Tumor** | **Cancer**  **treatment** | **IHC in renal tissue** | | | **IHC in tumor tissue** | | | **MN treatment** | **Renal outcome** |
| --- | --- | --- | --- | --- | --- | --- | --- | --- | --- | --- | --- | --- | --- |
| **PLA2R** | **THSD7A** | **NELL-1** | **PLA2R** | **THSD7A** | **NELL-1** |
| Zhou15  (2023, CN) | 68 | M | Esophageal cancer | First diagnosis of carcinoma 5 years earlier,  Relapse at the time of MN diagnosis | Surgery, Radiotherapy |  |  | + |  |  | + | ARB | PR |
| Zappi20 (2023, Swit) | 58 | M | Lung cancer | Same time | Surgery |  | + |  |  | + |  | RTX ACEI | NA |
| Morimoto18  (2022, JPN) | 50 | F | Lung cancer | Same time | Surgery | + |  |  | - |  |  | NA | CR |
| Yasuda7  (2021, JPN) | 26 | F | Renal cell carcinoma | 4 mo before MN diagnosis | Surgery | + |  |  | + |  |  | Glucocorticoid | PR |
| Baker17  (2021, US) | 68 | M | Esophageal cancer and Renal cell cancer | 3 mo before MN diagnosis | Chemotherapy, Radiation therapy | indeterminate |  |  | - |  |  | NA | NA |
| Chen9  (2021, CN) | 74 | M | Lung cancer | 11 mo before MN diagnosis | Chemotherapy |  | + |  |  | + |  | Glucocorticoid, RTX | CR |

**(Continued) Supplementary Table S5**

| Matsumoto8  (2021, JPN) | 68 | M | Bladder cancer | 36 mo before MN diagnosis | Surgery |  | Second time: THSD7A positive |  |  | + |  | Glucocorticoid | CR |
| --- | --- | --- | --- | --- | --- | --- | --- | --- | --- | --- | --- | --- | --- |
| Hanset19  (2020, BE) | 44 | M | Gastric cancer | Within 10 mo after the diagnosis of MN | Chemotherapy |  | + |  |  | + |  | NA | PR |
|  | 57 | M | Squamous cell carcinoma | Within 10 mo after the diagnosis of MN | Surgery |  | + |  |  | - |  | NA | PR |
|  | 60 | M | Hepatocarcinoma | Within 10 mo after the diagnosis of MN | Radiation therapy |  | + |  |  | - |  | NA | CR |
| Nickler22  (2020, Swit) | 58 | M | Lung cancer | Same time | Chemotherapy, Surgery |  | + |  |  | + |  | RTX | Non-remission |
| Ningning23  (2019, CHN) | 72 | M | Rectal cancer | First diagnosis of carcinoma 7 years earlier | Surgery |  | + |  |  | + |  | RTX | PR |
| Hara12  (2019, JPN) | 73 | M | Lung cancer | Same time | NA |  | + |  |  | - |  | Prednisone | CR |

**(Continued) Supplementary Table S5**

|  | 60 | M | Prostate cancer | Same time | NA |  | + |  |  | - |  | No | Non-remission |
| --- | --- | --- | --- | --- | --- | --- | --- | --- | --- | --- | --- | --- | --- |
| Taguchi11  (2019, JPN) | 77 | M | Rectal cancer | 36 mo before MN diagnosis | Surgery |  | + |  |  | + |  | NA | Non-remission |
| Zhang21 (2019, CN) | 56 | M | Lung caner | Same time | Surgery |  | + |  |  | + |  | NA | CR |
| Lin13  (2018, CN) | 62 | M | Neurofibromatosis | Same time | NA | + | + |  |  | + |  | Prednisone, CsA | Non-remission |
| Hoxha14  (2017, DEU) | 77 | F | Endometrium carcinoma | Relapse at the time of MN diagnosis | Surgery, curative |  | + |  |  | + |  | No | PR |
| Hoxha10  (2016, DEU) | 40 | F | Gallbladder cancer | Same time | Chemotherapy |  | + |  |  | + |  | NA | PR |
| Caza16  (2021, US) | 81 | M | Folicullar lymphoma | First diagnosis of  lymphoma 2 years earlier | Curative |  |  | + |  |  | + | NA | Non-remission |
|  | NA | F | Breast cancer | NA | NA |  |  | + |  |  | + | NA | NA |

**Abbreviation**: M, male; F, female; CR, complete remission; PR, partial remission; NA, not applicable.

**Supplementary Table S6** Comparison of clinical characteristics between MN patients with concomitant malignancy in our center and patients from the literature review

| **Characteristics** | **Total**  **（n=40）** | **MN with malignancy in our center (n=19)** | **MN with malignancy from literature review (n=21)** | **P-value** |
| --- | --- | --- | --- | --- |
| **Male sex, n(%)** | 29(72.5) | 13(68.4) | 16(76.2) | 0.58 |
| **Age，yr** | 58.0±14.4 | 54.4±14.5 | 61.5±13.8; n = 20 | 0.13 |
| **Prot, g/d** | 5.5(2.9,10.2) | 3.6(2.6,8.3) | 6.2(4.8,10.5); n = 15 | 0.09 |
| **Alb, g/l** | 25.6±8.7 | 29.0±6.8 | 20.2±8.9; n = 12 | 0.007 |
| **eGFR, ml/min/1.732** | 82.2±30.2 | 88.2±30.3 | 73.5±29.1; n = 13 | 0.11 |
| **Presence of glomerular PLA2R, n (%)** | 16(40.0) | 13(68.4) | 3(14.3) | 0.002 |
| **Presence of glomerular THSD7A, n (%)** | 17(42.5) | 3(15.8) | 14(66.7) | 0.003 |
| **Complete or partial remission, n (%)** | 20(71.4); n = 28 | 8(72.7); n = 11 | 12(70.6); n = 17 | 1 |

**Abbreviation**: yr, year; Alb, Albumin; Prot, 24 hours urinary protein quantitation; PLA2R, phospholipase A2 receptor; THSD7A, thrombospondin type 1 domain-containing 7A; eGFR, estimated glomerular filtration rate.

**Supplementary Table S7** Comparison of clinical and pathologic characteristics between all MN patients with concomitant malignancy showing concordant antigen staining and IMN patients

| **Characteristics** | **Concordant antigen staining(n=16)** | **IMN**  **(n=101)** | ***P*-value** |
| --- | --- | --- | --- |
| **Male sex, n (%)** | 11(68.8) | 58(57.4) | 0.39 |
| **Age, yr** | 68(44.0, 74.0); n = 15 | 54.0(42.0,62.5) | 0.025 |
| **Prot, g/d** | 6.2(4.6, 20.2); n = 11 | 5.1(3.9,7.2) | 0.18 |
| **Alb, g/l** | 21.4(13.5,28.1); n = 9 | 25.5(20.8,29.3) | 0.13 |
| **S-Crea, μmol/l** | 75.0(70.0, 94.6); n = 7 | 70.0(59.0,81.1) | 0.23 |
| **eGFR, ml/min/1.732** | 85.2(68.0,92.3); n = 8 | 98.3(83.6,110.7) | 0.05 |
| **Type of cancer, n (%)** | - | - | - |
| Digestive system | 5(31.3) | - | - |
| Urinary system | 3(18.8) | - | - |
| Respiratory system | 4(25.0) | - | - |
| Else | 4(25.0) | - | - |
| **Presence of PLA2R antibodies, n (%)** | 1(6.3); n = 5 | 56(55.5); n = 101 | 0.12 |
| **Complete or partial remission, n (%)** | 11(84.6); n = 13 | 97(96.0); n = 101 | 0.038 |
| **Presence of glomerular IgG, n (%)** |  |  |  |
| IgG1, n (%) | 4(66.7); n = 6 | 26(28.6); n = 101 | 0.07 |
| IgG2, n (%) | 4(80.0); n = 5 | 15(16.5); n = 101 | 0.001 |
| IgG3, n (%) | 1(20.0); n = 5 | 20(22.0); n = 101 | 1 |
| IgG4, n (%) | 3(50.0); n = 6 | 82(90.1); n = 101 | 0.024 |
| **IgG4 predominant deposits, n (%)** | 1(20.0); n = 5 | 77(76.2); n = 101 | ＜0.001 |
| **Presence of glomerular IgA, n (%)** | 2(40.0); n = 5 | 19(18.8); n = 101 | 0.56 |

**(Continued) Supplementary Table S7**

| **Presence of glomerular IgM, n (%)** | 2(50.0); n = 4 | 11(10.9); n = 101 | 0.12 |
| --- | --- | --- | --- |
| **Presence of glomerular C3, n (%)** | 4(80.0); n = 5 | 79(78.3); n = 101 | 1 |
| **Presence of glomerular C1q, n (%)** | 1(33.3); n = 3 | 5(5.0); n = 101 | 0.41 |
| **Presence of glomerular PLA2R, n (%)** | 1(6.3) | 93(92.1); n = 101 | ＜0.001 |
| **Presence of glomerular THSD7A, n (%)** | 11(68.8) | 2(3.6); n = 101 | ＜0.001 |
| **Presence of glomerular NELL-1, n (%)** | 3(18.8) | 4(26.7); n = 101 | 0.08 |

**Abbreviation**: yr, year; Alb, Albumin; Prot, 24 hours urinary protein quantitation; S-Crea, serum creatinine; PLA2R, phospholipase A2 receptor; THSD7A, thrombospondin type 1 domain-containing 7A; NELL-1, neural epidermal growth factor-like 1 protein; C3, complement component 3; C1q, complement component 1q; eGFR, estimated glomerular filtration rate; IgG, immunoglobulin G; IgA, immunoglobulin A; IgM, immunoglobulin M.

**Supplementary Table S8** Comparison of clinical and pathologic characteristics between MN patients with concomitant malignancy showing concordant and discordant antigen staining

| **Characteristics** | **Total**  **(n=26)** | **Concordant antigen staining**  **(n=16)** | **Discordant antigen staining (n=10)** | ***P*-value** |
| --- | --- | --- | --- | --- |
| **Male sex, n(%)** | 20(76.9) | 11(68.8) | 9(90.0) | 0.44 |
| **Age, yr** | 58.2±15.6; n = 25 | 60.5±16.7; n = 15 | 54.8±13.8 | 0.40 |
| **Prot, g/d** | 6.1(4.7,11.5); n = 20 | 6.2(4.6,20.2); n = 11 | 6.0(4.1,10.1) | 0.82 |
| **Alb, g/l** | 22.1±9.0; n = 17 | 21.1±9.4; n = 9 | 23.2±9.1; n = 8 | 0.66 |
| **S-Crea, umol/l** | 81.9±28.6; n = 15 | 81.6±22.3; n = 7 | 82.2±34.8; n = 8 | 0.97 |
| **eGFR, ml/min/1.732** | 81.0±29.5; n = 18 | 79.4±24.5; n = 8 | 82.2±34.3; n = 10 | 0.85 |
| **NS, n (%)** | 13(81.3); n = 16 | 8(88.9); n = 9 | 5(71.4); n = 7 | 0.81 |
| **Type of cancer, n (%)** |  |  |  |  |
| Digestive system | 8(30.8) | 5(31.3) | 3(30.0) | 0.95 |
| Urinary system | 5(19.2) | 3(18.8) | 2(20.0) | 0.94 |
| Respiratory system | 7(26.9) | 4(25.0) | 3(30.0) | 0.78 |
| Else | 6(23.1) | 4(25.0) | 2(20.0) | 0.77 |
| **Time of diagnosis of tumor, n (%)** |  |  |  |  |
| Before | 8(30.8) | 7(50.0); n = 14 | 1(10.0); n = 10 | 0.17 |
| Same time | 8(30.8) | 4(28.6); n = 14 | 4(40.0); n = 10 | 0.71 |
| After | 8(30.8) | 3(21.4); n = 14 | 5(50.0); n = 10 | 0.21 |
| **Presence of PLA2R antibodies, n (%)** | 4(44.4); n = 9 | 1(20.0); n = 5 | 3(75.0); n = 4 | 0.33 |
| **Complete or partial remission, n (%)** | 15(71.4); n = 21 | 11(84.6); n = 13 | 4(50.0); n = 8 | 0.23 |

**(Continued) Supplementary Table S8**

| **Presence of glomerular IgG, n (%)** |  |  |  |  |
| --- | --- | --- | --- | --- |
| IgG1, n (%) | 6(50.0); n = 12 | 4(66.7); n = 6 | 2(33.3); n = 6 | 0.56 |
| IgG2, n (%) | 7(63.6); n = 11 | 4(80.0); n = 5 | 3(50.0); n = 6 | 0.69 |
| IgG3, n (%) | 1(9.1); n = 11 | 1(20.0); n = 5 | 6(100.0); n = 6 | 0.92 |
| IgG4, n (%) | 7(53.8); n = 13 | 3(50.0); n = 6 | 4(57.1); n = 7 | 0.80 |
| **IgG4 predominant deposits, n (%)** | 5(19.2); n = 12 | 1(6.3); n = 5 | 4(40.0); n = 7 | 0.06 |
| **Presence of glomerular IgA, n (%)** | 4(33.3); n = 12 | 2(40.0); n = 5 | 2(28.6); n = 7 | 1 |
| **Presence of glomerular IgM, n (%)** | 4(36.4); n = 11 | 2(50.0); n = 4 | 2(28.6); n = 7 | 0.95 |
| **Presence of glomerular C3, n (%)** | 10(83.3); n = 12 | 4(80.0); n = 5 | 6(85.7); n = 7 | 1 |
| **Presence of glomerular C1q, n (%)** | 2(22.2); n = 9 | 1(33.3); n = 3 | 1(16.7); n = 6 | 1 |
| **Presence of glomerular PLA2R, n (%)** | 5(19.2) | 1(6.3) | 4(40.0) | 0.11 |
| **Presence of glomerular THSD7A, n (%)** | 15(57.7) | 11(68,8) | 4(40.0) | 0.30 |
| **Presence of glomerular NELL1, n (%)** | 4(15.4) | 3(18.8) | 1(10.0) | 0.97 |
| **Presence of cancer PLA2R，n(%)** | 2(7.7) | 2(12.5) | 3(75.0); n = 4 | 0.68 |
| **Presence of cancer THSD7A，n(%)** | 15(57.7) | 12(75.0) | 4(40.0) | 0.04 |
| **Presence of cancer NELL-1，n(%)** | 3(11.5) | 3(18.8) | 1(10.0) | 0.41 |

**Abbreviation**: yr, year; NS, nephrotic syndrome; Alb, Albumin; Prot, 24 hours urinary protein quantitation; S-Crea, serum creatinine; PLA2R, phospholipase A2 receptor; THSD7A, thrombospondin type 1 domain-containing 7A; NELL-1, neural epidermal growth factor-like 1 protein; IgG, immunoglobulin G; IgA, immunoglobulin A; IgM, immunoglobulin M; C3, complement component 3; C1q, complement component 1q; eGFR, estimated glomerular filtration rate.

**Supplementary Table S9** Comparison of clinical and pathologic characteristics between THSD7A positive MN patients with malignancy and THSD7A positive IMN patients

| **Characteristics** | **Total**  **(n=24)** | **THSD7A positive MN with malignancy (n=17)** | **THSD7A positive**  **I-MN (n=7)** | ***P*-value** |
| --- | --- | --- | --- | --- |
| **Male sex, n (%)** | 18.0(75.0) | 15(88.2) | 3(42.9) | 0.07 |
| **Age, yr** | 57.4±14.0 | 61.4±12.3 | 47.9±14.3 | 0.028 |
| **Prot, g/d** | 5.7(3.4,9.8); n = 21 | 5.5(3.1,18.7); n = 14 | 6.2(3.6,7.6) | 0.91 |
| **Alb, g/l** | 22.1±9.4; n = 17 | 23.8±11.6; n = 10 | 19.8±4.5 | 0.60 |
| **eGFR, ml/min/1.732** | 85.2±27.8; n = 20 | 73.9±27.6; n = 13 | 106.2±11.7 | 0.003 |
| **NS, n (%)** | 14(82.4); n = 17 | 7(70.0); n = 10 | 7(100.0) | 0.34 |
| **Type of cancer, n (%)** |  |  |  |  |
| Digestive system | - | 6(35.3) | - | - |
| Urinary system | - | 4(23.5) | - | - |
| Respiratory system | - | 5(29.4) | - | - |
| Else | - | 2(11.8) | - | - |
| **Presence of PLA2R antibodies, n (%)** | 2(15.4); n = 13 | 0(0.0); n = 6 | 2(28.6); n = 4 | 0.51 |
| **Complete or partial remission, n (%)** | 16(80.0); n = 20 | 10(76.9); n = 13 | 6(85.7) | 1 |
| **Presence of glomerular IgG, n (%)** |  |  |  |  |
| IgG1, n (%) | 9(60.0); n = 15 | 4(50.0); n = 8 | 5(71.4) | 0.75 |
| IgG2, n (%) | 5(35.7); n = 14 | 4(57.1); n = 7 | 1(14.3) | 0.27 |
| IgG3, n (%) | 1(7.1); n = 14 | 0(0.0); n = 7 | 1(14.3) | 1 |
| IgG4, n (%) | 8(53.3); n = 15 | 4(50.0); n = 8 | 4(57.1) | 1 |

**(Continued) Supplementary Table S9**

| **IgG4 predominant deposits, n (%)** | 6(25.0); n = 14 | 2(11.8); n = 7 | 4(57.1) | 0.005 |
| --- | --- | --- | --- | --- |
| **Presence of glomerular IgA, n (%)** | 3(21.4); n = 14 | 2(28.6); n = 7 | 1(14.3) | 1 |
| **Presence of glomerular IgM, n (%)** | 3(23.1); n = 13 | 2(33.3); n = 6 | 1(14.3) | 0.88 |
| **Presence of glomerular C3, n (%)** | 13(86.7); n = 15 | 7(87.5); n = 8 | 6(85.7) | 1 |
| **Presence of glomerular C1q, n (%)** | 3(23.1); n = 13 | 3(17.6); n = 6 | 0(0.0) | 0.14 |

**Abbreviation**: yr, year; NS, nephrotic syndrome; Alb, Albumin; Prot, 24 hours urinary protein quantitation; PLA2R, phospholipase A2 receptor; IgG, immunoglobulin G; IgA, immunoglobulin A; IgM, immunoglobulin M; C3, complement component 3; C1q, complement component 1q; eGFR, estimated glomerular filtration rate.
